# Supplementary material for: Glucose Controls the Expression of Polypyrimidine Tract-Binding Protein 1 via the Insulin Receptor Signaling Pathway in Pancreatic β Cells
Source: PubMed Central journal article supplement — Mol Cells. 2018 Aug 31;41(10):909–16. doi: 10.14348/molcells.2018.0147 (PMC6199568; doi:10.14348/molcells.2018.0147), 2018-08-31
Supplement: molce-41-10-909-suppl.pdf [file molce-41-10-909-suppl.pdf]

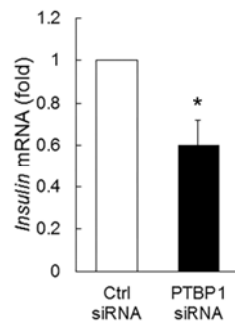

**Supplementary Fig. S1. Levels of *insulin* mRNA in  $\beta$ IRWT and  $\beta$ IRKO cells.** Levels of *insulin* mRNA were assessed by RT-qPCR analysis and mRNA amounts were normalized to the levels of *18S* rRNA. Data represent the mean  $\pm$  SEM from at least three independent experiments. \* $P < 0.05$  versus the  $\beta$ IRWT group using Student's *t*-test.

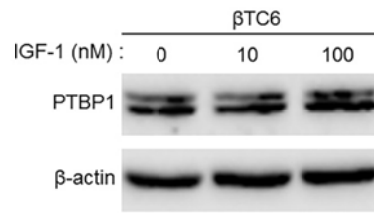

**Supplementary Fig. S2. Levels of PTBP1 in  $\beta$ TC6 cells treated with IGF-1.**  $\beta$ TC6 cells were starved for 12 h in DMEM containing 5 mM glucose and 0.1% FBS and further incubated for 12 h with the indicated concentrations of IGF-1. Levels of PTBP1 and  $\beta$ -actin were assessed by western blot analysis.

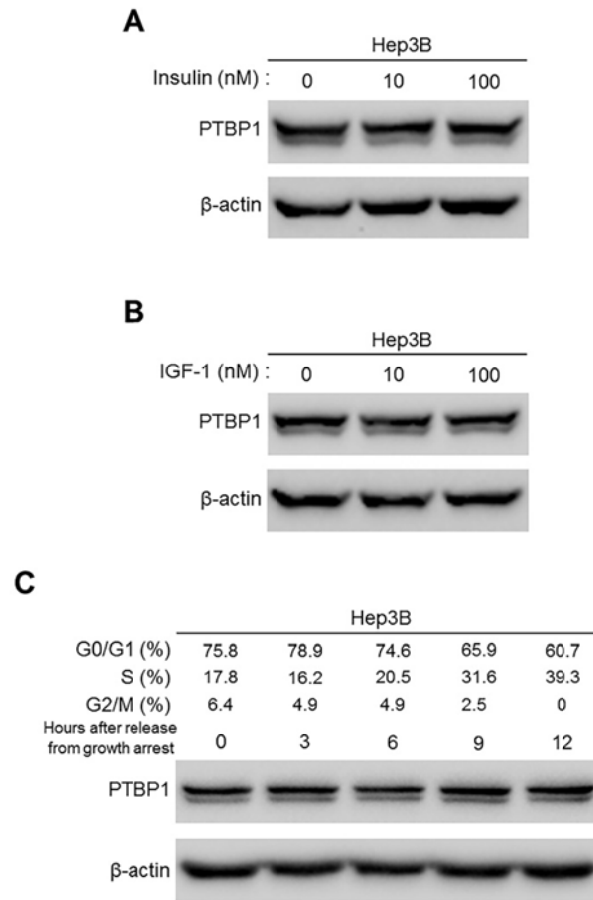

**Supplementary Fig. S3. Levels of PTBP1 and proinsulin in Hep3B cells.** (A and B) Levels of PTBP1 and  $\beta$ -actin in Hep3B cells treated with insulin (A) or IGF-1 (B). Hep3B cells were starved for 12 h in DMEM containing 5 mM glucose and 0.1% FBS and further incubated for 12 h with the indicated concentrations of insulin (A) or IGF-1 (B). (C) Levels of PTBP1 and  $\beta$ -actin in Hep3B cells synchronized by double thymidine block for 24 h and then released for the indicated times. Levels of PTBP1 and  $\beta$ -actin were assessed by western blot analysis.

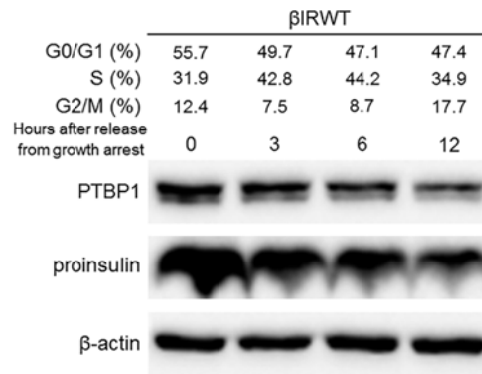

**Supplementary Fig. S4. Correlation of PTBP1 and proinsulin levels during cell cycle progression.** βIRWT cells were synchronized by double thymidine block for 24 h and then released for the indicated times. Levels of PTBP1 and proinsulin were assessed by western blot analysis.

**Supplementary Table S1. Details of primary antibodies used in this study**

| <b>Antibody</b>                              | <b>IHC or IF</b> | <b>WB</b> | <b>Specificity</b>    | <b>Company</b> |
|----------------------------------------------|------------------|-----------|-----------------------|----------------|
| <b>PTBP1</b>                                 | 1:100            | 1:1000    | Rabbit polyclonal     | Abcam          |
| <b>Insulin</b>                               | 1:200            |           | Guinea pig polyclonal | Millipore      |
|                                              |                  | 1:1000    | Rabbit polyclonal     | Santa Cruz     |
| <b>IR<math>\beta</math></b>                  |                  | 1:1000    | Rabbit polyclonal     | Santa Cruz     |
| <b>p-IR<math>\beta</math> (Tyr1162/1163)</b> |                  | 1:1000    | Rabbit polyclonal     | Santa Cruz     |
| <b>Akt</b>                                   |                  | 1:1000    | Rabbit polyclonal     | Cell Signaling |
| <b><math>\beta</math>-actin</b>              |                  | 1:1000    | Mouse monoclonal      | Abcam          |

**Supplementary Table S2. Details of siRNAs used in this study**

---

|              | <b>Source or sequence (5'–3')</b>  |
|--------------|------------------------------------|
| <i>PTBPI</i> | AGA CCA GAG AUU UUA UUU UUU UU     |
| <i>IR</i>    | Santa Cruz (sc-35673)              |
| <i>Akt</i>   | Santa Cruz (sc-43610 and sc-38912) |

---

**Supplementary Table S3. PCR primer sequences**

|                       | <b>Forward Primer (5'–3')</b>         | <b>Reverse Primer (5'–3')</b>       |
|-----------------------|---------------------------------------|-------------------------------------|
| <b><i>GAPDH</i></b>   | CGA CTT CAA CAG CAA CTC CCA CTC TCC C | TGG GTG GTC CAG GGT TTC TTA CTC CTT |
| <b><i>PTBPI</i></b>   | TCC TGA CTG TGC AGG TCT TG            | GGG GTC ACC GAG GTG TAG TA          |
| <b><i>Insulin</i></b> | CCA CCC AGG CTT TTG TCA AA            | CCC AGC TCC AGT TGT TCC AC          |
